# Supplementary material for: 3D printed high density, reversible, chip-to-chip microfluidic interconnects
Source: Royal Society of Chemistry journal article supplement (doi:10.1039/c7lc01113j), 2018-01-01
Supplement: c7lc01113j1.pdf [file c7lc01113j1.pdf]

Supplementary Material (ESI) for Lab on a Chip

## 3D printed high density, reversible, chip-to-chip microfluidic interconnects

Hua Gong,<sup>a</sup> Adam T. Woolley,<sup>b</sup> and Gregory P. Nordin<sup>\*a</sup>

<sup>a</sup> Department of Electrical and Computer Engineering, Brigham Young University, Provo, UT 84602, United States; E-mail: nordin@byu.edu

<sup>b</sup> Department of Chemistry and Biochemistry, Brigham Young University, Provo, UT 84602, United States.

**Video.** Video S1 shows a 45 valve array actuated sequentially row-by-row with a 50 ms scrolling action in which each row of valves is actuated 100 ms. The valves are 300  $\mu\text{m}$  in diameter. To individually control 9 rows of valves and individually connect fluid to each of the 5 columns,  $2 \times 9 + 2 \times 5 = 28$  CCIM connections are made to an interface chip with 28 matching PTFE tubes. The interface and valve array chips are clamped together such that the CCIMs seal around corresponding holes in the interface chip in a manner similar to Fig. 2 in the main text, except the 28 CCIMs are spatially dispersed around the edges of the 45 valve array.
